# Supplementary material for: Preparation of Y3Ga5O12:Pr3+ nanotubes with a single-crystal structure via single-nozzle electrospinning for temperature sensing applications
Source: Royal Society of Chemistry journal article supplement (doi:10.1039/d4ce00743c), 2024-01-01
Supplement: d4ce00743c1.pdf [file d4ce00743c1.pdf]

## Supporting Information

### **Preparation of $\text{Y}_3\text{Ga}_5\text{O}_{12}:\text{Pr}^{3+}$ nanotubes with a single-crystal structure via single-nozzle electrospinning for temperature sensing applications**

Zhichao Ren, Hongquan Yu\*, Xiangping Li, jinsu Zhang, Sai Xu, Baojiu Chen\*

Department of Physics, Dalian Maritime University, Dalian 116026, Liaoning, China

\*Corresponding author: **Hongquan Yu, Baojiu Chen**

Address: No. 1, Linghai Road, Dalian 116026, Liaoning, P. R. China

E-mail: yuhq7808@126.com (H. Yu); bjchen@dlmu.edu.cn (B. Chen)

Tel/Fax: +86-411-84728909

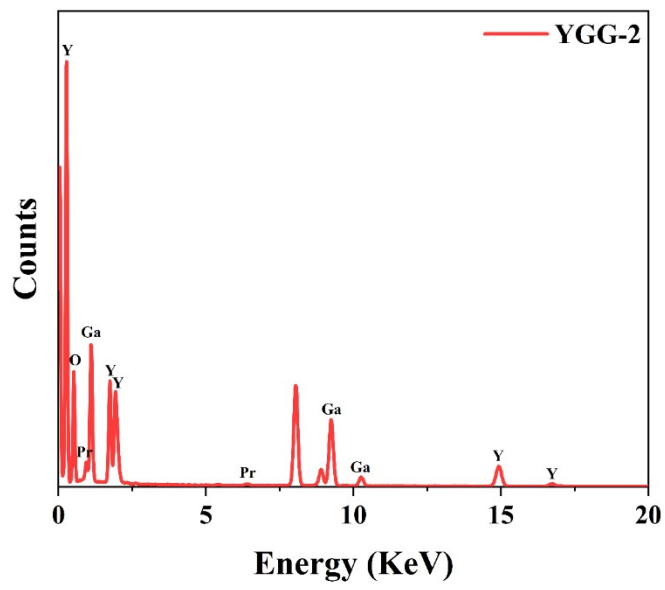

**Fig. S1.** EDS pattern of YGG-2 nanotubes.

**Table S1.** Rietveld refinement results of XRD patterns of the  $\text{Y}_3\text{Ga}_5\text{O}_{12}:\text{Pr}^{3+}$  nanotubes.

| <b>Formula</b>                    | <b>YGG-1</b>                         | <b>YGG-2</b>                         | <b>YGG-3</b>                         | <b>YGG-4</b>                         |
|-----------------------------------|--------------------------------------|--------------------------------------|--------------------------------------|--------------------------------------|
|                                   | Cu K $\alpha_1$                      | Cu K $\alpha_1$                      | Cu K $\alpha_1$                      | Cu K $\alpha_1$                      |
|                                   | radiation with                       | radiation with                       | radiation with                       | radiation with                       |
| <b>Radiation type</b>             | $\lambda = 1.5406 \text{ \AA}$       |
|                                   | Cu K $\alpha_2$                      | Cu K $\alpha_2$                      | Cu K $\alpha_2$                      | Cu K $\alpha_2$                      |
|                                   | radiation with                       | radiation with                       | radiation with                       | radiation with                       |
|                                   | $\lambda = 1.5444 \text{ \AA}$       |
| <b>2<math>\theta</math> range</b> | 10-75°                               | 10-75°                               | 10-75°                               | 10-75°                               |
| <b>Phase structure</b>            | cubic crystal structure              | cubic crystal structure              | cubic crystal structure              | cubic crystal structure              |
| <b>Space group</b>                | $Ia-3d$                              | $Ia-3d$                              | $Ia-3d$                              | $Ia-3d$                              |
| <b>Cell parameters</b>            | $a = 12.410284 \text{ \AA}$          | $a = 12.400273 \text{ \AA}$          | $a = 12.400867 \text{ \AA}$          | $a = 12.416867 \text{ \AA}$          |
|                                   | $b = 12.410284 \text{ \AA}$          | $b = 12.400273 \text{ \AA}$          | $b = 12.400867 \text{ \AA}$          | $b = 12.416867 \text{ \AA}$          |
|                                   | $c = 12.410284 \text{ \AA}$          | $c = 12.400273 \text{ \AA}$          | $c = 12.400867 \text{ \AA}$          | $c = 12.416867 \text{ \AA}$          |
|                                   | $\alpha = \beta = \gamma = 90^\circ$ |
|                                   | $V = 1911.372 \text{ \AA}^3$         | $V = 1906.750 \text{ \AA}^3$         | $V = 1907.024 \text{ \AA}^3$         | $V = 1914.415 \text{ \AA}^3$         |
| <b>Reliability factors</b>        | $\chi^2 = 1.832$                     | $\chi^2 = 1.896$                     | $\chi^2 = 1.908$                     | $\chi^2 = 1.922$                     |
|                                   | $R_{wp} = 3.42\%$                    | $R_{wp} = 3.55\%$                    | $R_{wp} = 3.60\%$                    | $R_{wp} = 3.56\%$                    |
|                                   | $R_p = 2.69\%$                       | $R_p = 2.70\%$                       | $R_p = 2.75\%$                       | $R_p = 3.00\%$                       |
